# Supplementary material
Source: PubMed Central journal article supplement (PMC3679231)
Supplement: auto-8-1477-s01.pdf [file auto-8-1477-s01.pdf]

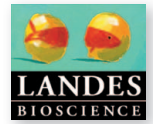

## **Supplemental Material to:**

**Tsung-Chin Lin, Yun-Ru Chen, Elizabeth Kensicki,  
Angela Ying-Jian Li, Mei Kong, Yang Li, Robert P. Mohny,  
Han-Ming Shen, Bangyan Stiles, Noboru Mizushima,  
Liang-In Lin and David K. Ann**

**Autophagy: Resetting glutamine-dependent metabolism  
and oxygen consumption**

**Autophagy 2012; 8(10)**

**<http://dx.doi.org/10.4161/auto.21228>**

**[www.landesbioscience.com/journals/autophagy/article/21228](http://www.landesbioscience.com/journals/autophagy/article/21228)**

**Figure S1.** Complete metabolomic profile of WT and *atg5*<sup>-/-</sup> MEFs under glutamine depletion. Hierarchical cluster (single dendrogram clustered by biomolecules) analysis of 204 analyzed biomolecules with complete linkage algorithm is shown. Signal fold change was normalized to WT at 0 h set as 1. All data points were log<sub>2</sub> transformed and used to calculate the Self-Organizing Map. Transformed fold changes are shown in green (decreasing) and red (increasing).

**Figure S2.** *Atg5* regulates the metabolic response to glutamine depletion in m5-7 cells. (A) Lower intracellular glutamine levels in Dox-treated “ATG5-off” m5-7 cells. The m5-7 cells, which were derived from *atg5*<sup>-/-</sup> MEFs and stably express an inducible tetracycline-off *Atg5* construct<sup>1</sup>, were cultured in the presence and absence of Dox. The repression of ATG5 expression was confirmed by Western blot (right panel). Intracellular glutamine levels were measured and normalized to cell number (left panel). Cells were harvested at the end of glutamine deprivation (0, 6 and 24 h). (B–E) Glutamine depletion increases glucose consumption and lactate production. Dox<sup>+</sup> “ATG5-off” m5-7 cells exhibited lower glucose consumption and reduced ability to produce lactate upon glutamine depletion. The amounts of (B) glucose, (C) lactate, (D) sodium and (E) potassium ions in the medium, collected individually at the end of glutamine deprivation (0, 6 and 24 h), were analyzed, normalized (5 × 10<sup>6</sup> cells), and plotted. The data were collected from three independent experiments. Dox: doxycycline; \*p < 0.05.

**Figure S3.** Glutamine depletion decreased the level of  $\gamma$ -glutamyl amino acids and non-essential amino acids in WT MEFs but increased them in *atg5*<sup>-/-</sup> MEFs. (A) Alterations of alanine, glutamine, glutamate, aspartate, proline and asparagine levels in glutamine-starved WT and *atg5*<sup>-/-</sup> MEFs. Signal fold change was normalized to WT at 0 h set as 1 and log<sub>2</sub>-transformed. Transformed fold changes are shown in green (decreasing) and red (increasing). (B) Profiles of  $\gamma$ -glutamyl-leucine,  $\gamma$ -glutamyl-isoleucine,  $\gamma$ -glutamyl-valine and  $\gamma$ -glutamyl-threonine in WT and *atg5*<sup>-/-</sup> MEFs subjected to glutamine withdrawal. Cell preparation, quantitation and data

analyses were performed as described in Figure 2. \*p < 0.05; \*\*p < 0.01; \*\*\*p < 0.001; Gln: glutamine.

**Figure S4.** Glutamine supplementation rescued cell proliferation. (A) Cell proliferation was inhibited by glutamine depletion and 2-DG treatment. WT and *atg5<sup>-/-</sup>* MEFs were seeded in complete medium to reach 10% confluence on the day of treatment, and then grown in serum-supplemented DMEM in the presence and absence of glutamine (4 mM) or in full medium with 2-DG (10 mM) for the indicated time periods. Relative cell proliferation (determined by the cell proliferation assay in methods) with each treatment was calculated by comparing to the 0 h time point, set as 1. Results from three independent experiments are shown as the mean  $\pm$  S.D. The student's *t*-test was performed to determine the difference between (a) control (24/48 h) and -Gln (24/48 h); (b) control (24/48 h) and 2-DG (24/48 h). \*p < 0.05. (B) WT and *atg5<sup>-/-</sup>* MEFs were seeded in complete medium to reach 10% confluence on the day of treatment, and then grown in glutamine-depleted DMEM with the indicated supplements. Cell proliferation assays were performed at the end of indicated time periods. Results from three independent experiments are shown as the mean  $\pm$  S.D. Gln: glutamine (4 mM); dNTP: deoxynucleotides triphosphate (10  $\mu$ M); dNMP: deoxynucleotides monophosphate (10  $\mu$ M); IMP: inosine monophosphate (10  $\mu$ M); MP: methylpyruvate (10 mM).

**Figure S5.** Lack of autophagy induction by glutamine deprivation in tfLC3-m5-7 cells. The m5-7 cells, which were derived from *atg5<sup>-/-</sup>* MEFs and stably express an inducible tetracycline-off *Atg5* construct<sup>1</sup>, were transiently transfected with mRFP-GFP tandem fluorescent-tagged MAP1LC3 (tfLC3). (A) Suppression of ATG5 expression by Dox-treatment in m5-7 cells. ATG5 was expressed in the absence of Dox (B, D, F and H) or suppressed in the presence of doxycycline (Dox; 20  $\mu$ g/ml; (C, E, G and I)). The cells were maintained in (B and C) complete medium, (D and E) EBSS for 6 and 24 h, (F and G) medium supplemented with 2-DG (10 mM) for 6 and 24 h or (H and I) glutamine-depleted medium for 6 and 24 h. Gln, glutamine; 2-DG, 2-deoxyglucose; Scale bar, 10 microns.

**Reference**

1. Hosokawa N, Hara Y, Mizushima N. Generation of cell lines with tetracycline-regulated autophagy and a role for autophagy in controlling cell size. FEBS letters 2006; **580** (11):2623-2629.

- Gln

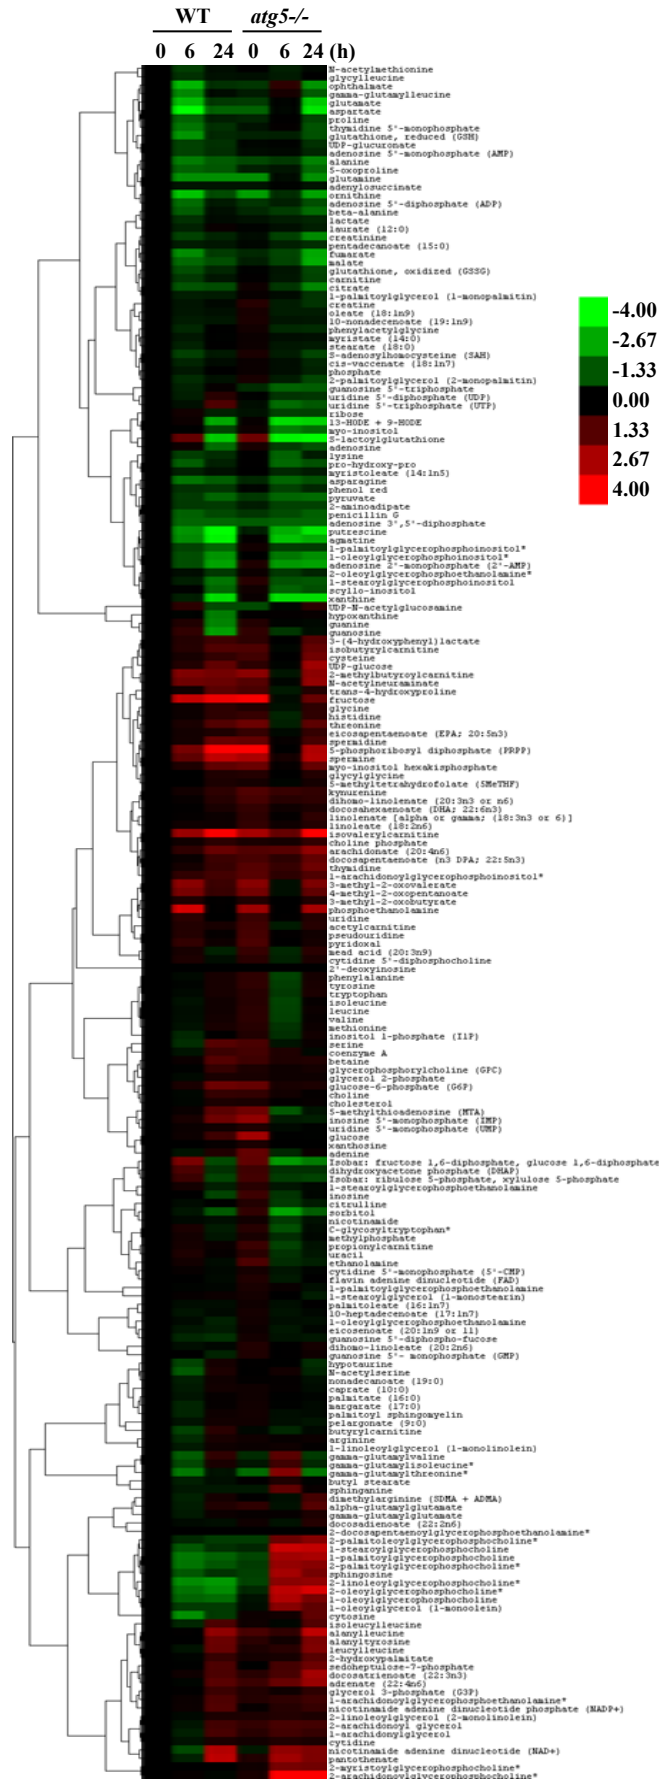

Figure S1

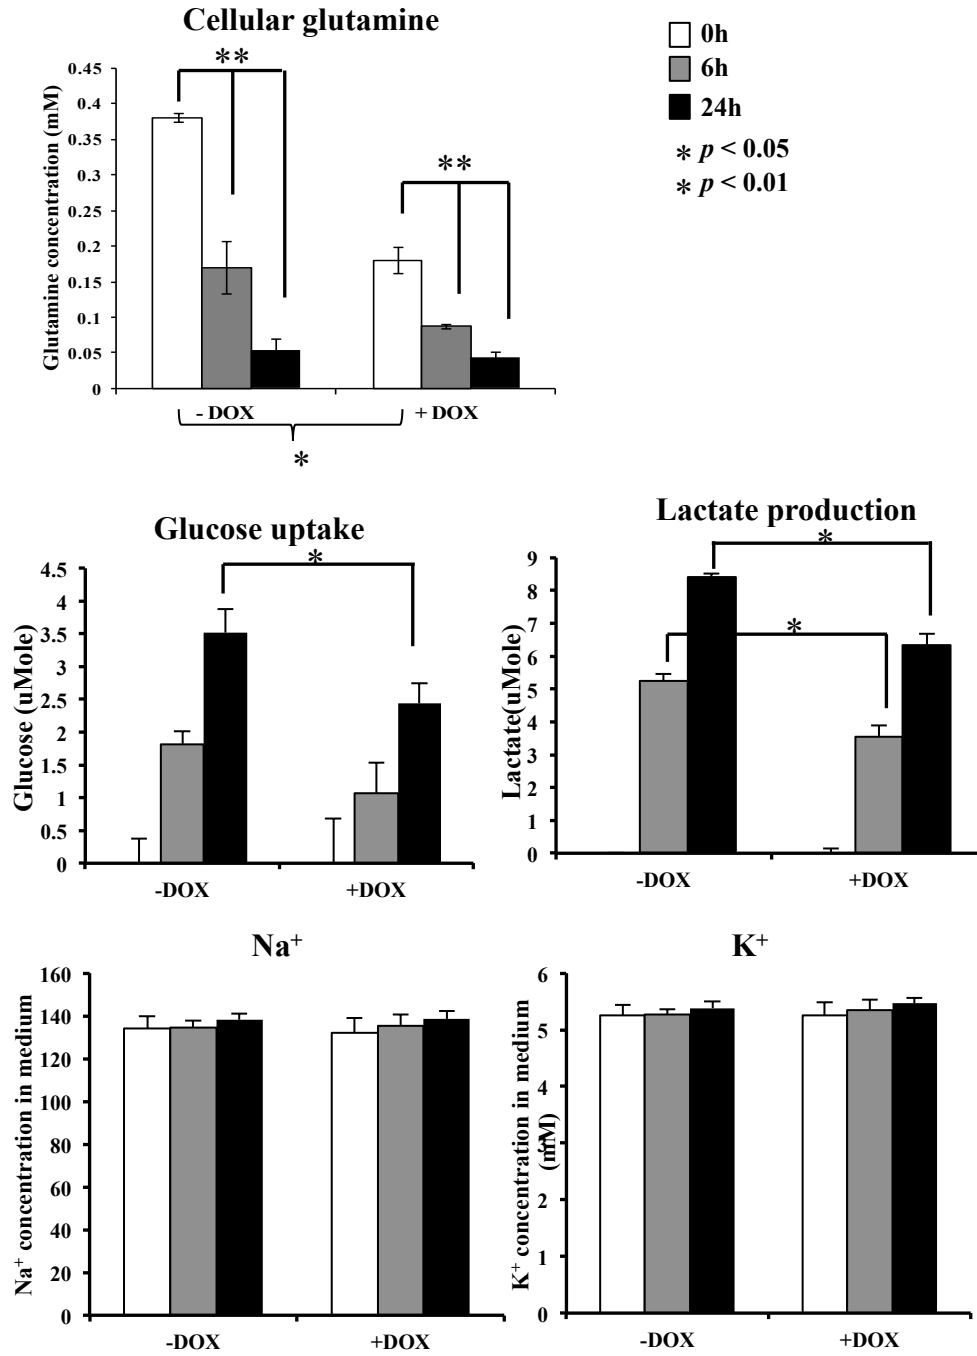

Figure S2

**A**

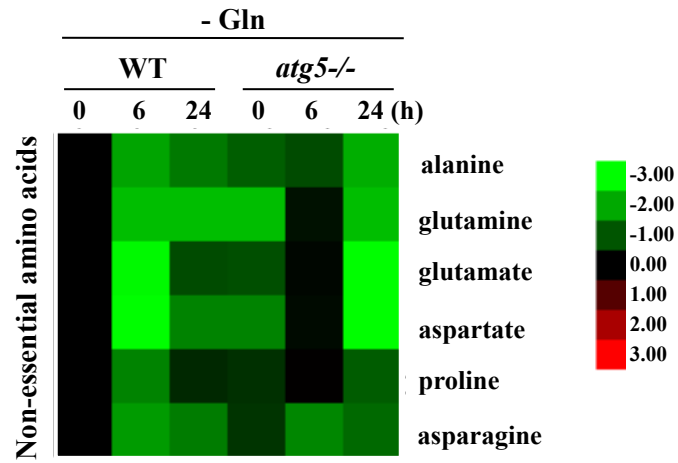

**B**

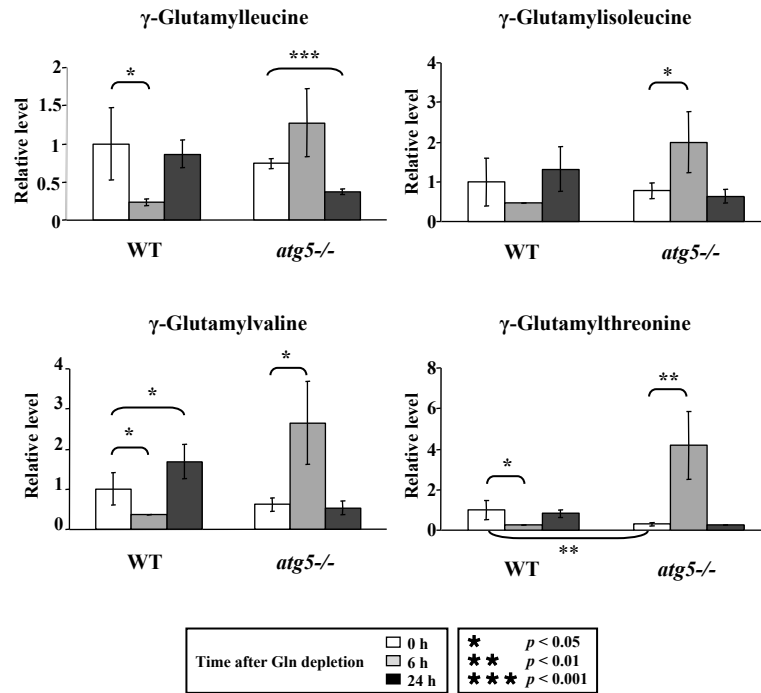

**Figure S3**

**A**

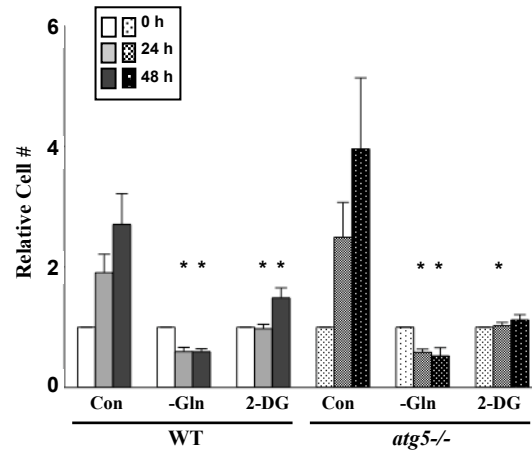

**B**

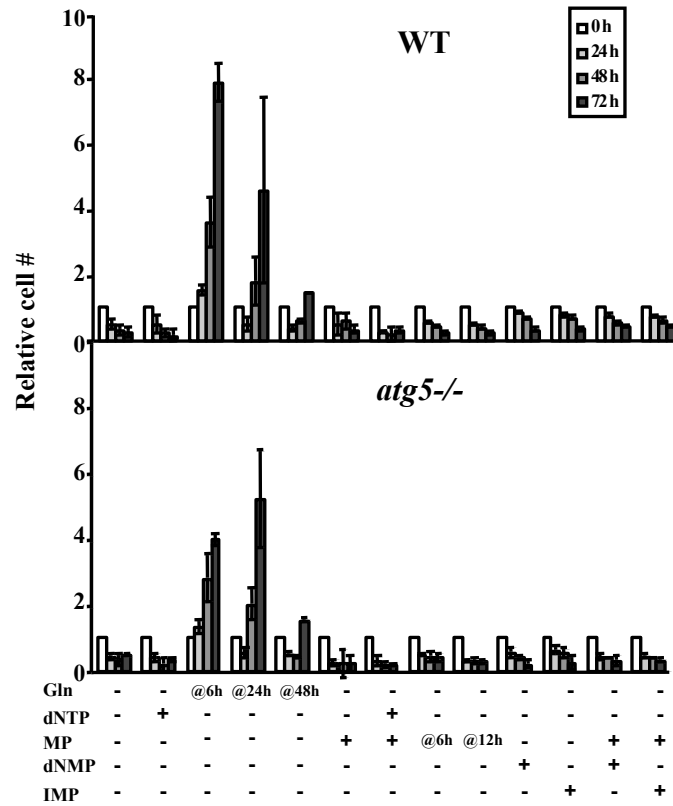

**Figure S4**



A

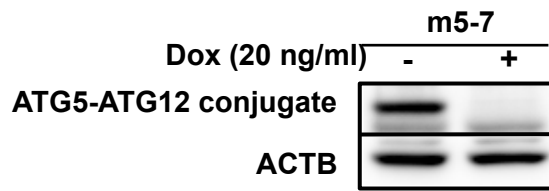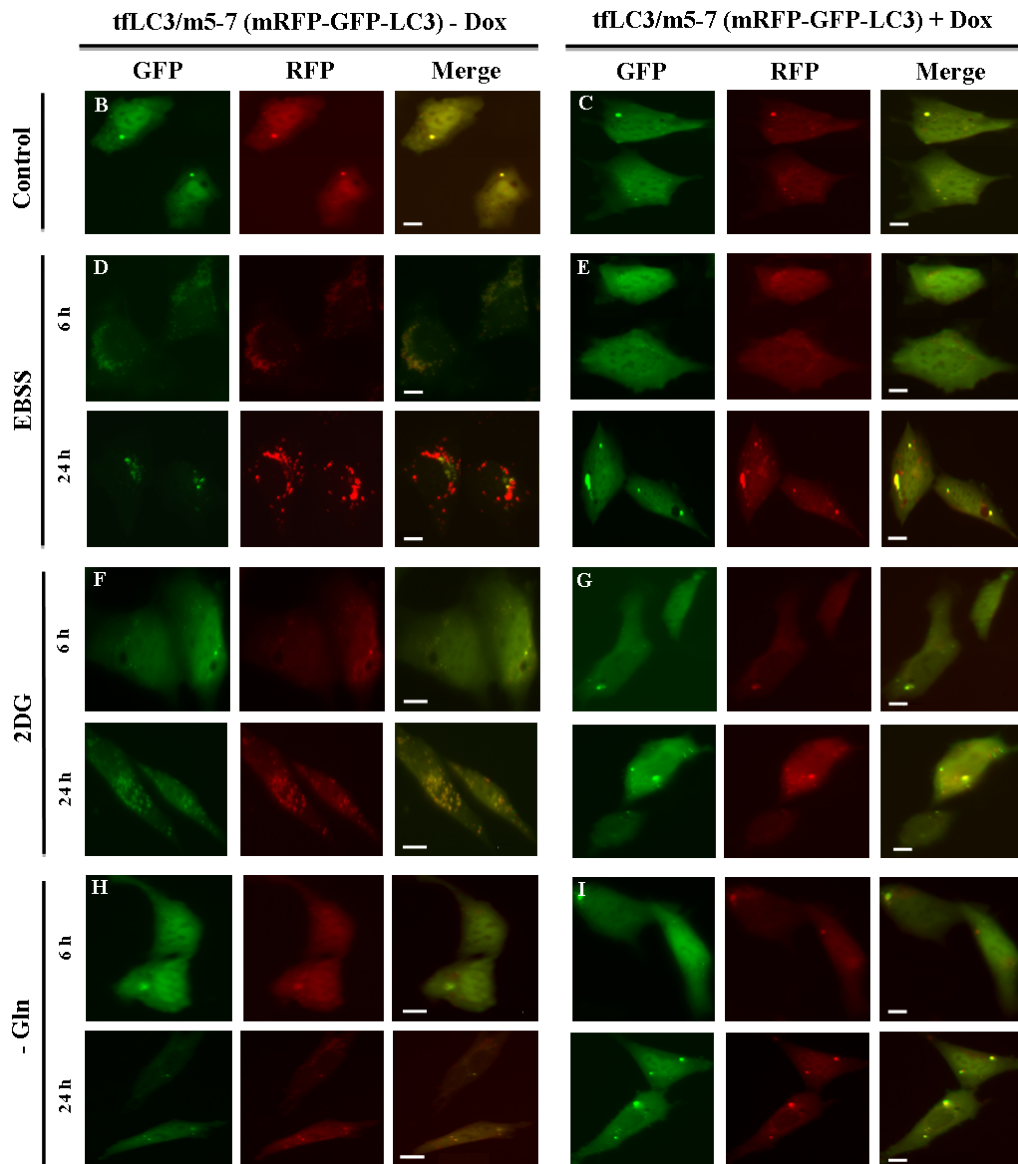

Figure S5

**Supplementary Table S1. Compounds with significant differences between WT MEFs and *atg5*<sup>-/-</sup> MEFs.**

| Super Pathway                   | Sub Pathway                                   | Biochemical Name                      | Ratio of basal <i>atg5</i> <sup>-/-</sup> / WT) |       |
|---------------------------------|-----------------------------------------------|---------------------------------------|-------------------------------------------------|-------|
| <b>Upregulated</b>              |                                               |                                       |                                                 |       |
| Amino Acid                      | Creatine metabolism                           | creatine                              | 1.53                                            |       |
|                                 | Cysteine, methionine, SAM, taurine metabolism | cysteine                              | 2.05                                            |       |
|                                 | Cysteine, methionine, SAM, taurine metabolism | S-adenosylhomocysteine (SAH)          | 1.34                                            |       |
|                                 | Cysteine, methionine, SAM, taurine metabolism | methionine                            | 1.52                                            |       |
|                                 | Glycine, serine and threonine metabolism      | glycine                               | 1.43                                            |       |
|                                 | Glycine, serine and threonine metabolism      | serine                                | 2.24                                            |       |
|                                 | Glycine, serine and threonine metabolism      | threonine                             | 3.23                                            |       |
|                                 | Glycine, serine and threonine metabolism      | betaine                               | 1.96                                            |       |
|                                 | Histidine metabolism                          | histidine                             | 1.82                                            |       |
|                                 | Phenylalanine & tyrosine metabolism           | phenylalanine                         | 1.67                                            |       |
|                                 | Phenylalanine & tyrosine metabolism           | tyrosine                              | 1.68                                            |       |
|                                 | Phenylalanine & tyrosine metabolism           | 3-(4-hydroxyphenyl)lactate            | 1.64                                            |       |
|                                 | Polyamine metabolism                          | spermine                              | 6.43                                            |       |
|                                 | Polyamine metabolism                          | spermidine                            | 2.89                                            |       |
|                                 | Polyamine metabolism                          | 5-methylthioadenosine (MTA)           | 3.37                                            |       |
|                                 | Tryptophan metabolism                         | C-glycosyltryptophan*                 | 1.52                                            |       |
|                                 | Tryptophan metabolism                         | tryptophan                            | 1.54                                            |       |
|                                 | Urea cycle; arginine-, proline-, metabolism   | citrulline                            | 1.46                                            |       |
|                                 | Valine, leucine and isoleucine metabolism     | 3-methyl-2-oxoalate                   | 4.37                                            |       |
|                                 | Valine, leucine and isoleucine metabolism     | isoleucine                            | 1.52                                            |       |
|                                 | Valine, leucine and isoleucine metabolism     | leucine                               | 1.59                                            |       |
|                                 | Valine, leucine and isoleucine metabolism     | valine                                | 1.61                                            |       |
|                                 | Valine, leucine and isoleucine metabolism     | 4-methyl-2-oxopentanoate              | 3.52                                            |       |
|                                 | Valine, leucine and isoleucine metabolism     | 2-methylbutyrylcarnitine              | 4.53                                            |       |
|                                 | Valine, leucine and isoleucine metabolism     | isovalerylcarnitine                   | 6.16                                            |       |
|                                 | Carbohydrate                                  | Aminosugars metabolism                | N-acetylneuraminate                             | 2.53  |
|                                 |                                               | Nucleotide sugars, pentose metabolism | 5-phosphoribosyl diphosphate (PRPP)             | 16.16 |
|                                 | Cofactors and vitamins                        | Folate metabolism                     | 5-methyltetrahydrofolate (5MeTHF)               | 1.27  |
| Pantothenate and CoA metabolism |                                               | pantothenate                          | 1.44                                            |       |
| Pyridoxal metabolism            |                                               | pyridoxal                             | 2.27                                            |       |
| Riboflavin metabolism           |                                               | flavin adenine dinucleotide (FAD)     | 1.42                                            |       |
| Pantothenate and CoA metabolism |                                               | coenzyme A                            | 2.08                                            |       |
| Lipid                           | Carnitine metabolism                          | acetylcarnitine                       | 2.03                                            |       |

|            |                                                      |                                            |      |
|------------|------------------------------------------------------|--------------------------------------------|------|
|            | Essential fatty acid                                 | linolenate [alpha or gamma; (18:3n3 or 6)] | 1.65 |
|            | Essential fatty acid                                 | dihomo-linolenate (20:3n3 or n6)           | 2.15 |
|            | Essential fatty acid                                 | docosapentaenoate (n3 DPA; 22:5n3)         | 2.18 |
|            | Essential fatty acid                                 | docosahexaenoate (DHA; 22:6n3)             | 1.73 |
|            | Essential fatty acid                                 | eicosapentaenoate (EPA; 20:5n3)            | 1.8  |
|            | Fatty acid metabolism (also BCAA metabolism)         | propionylcarnitine                         | 1.89 |
|            | Glycerolipid metabolism                              | glycerol 3-phosphate (G3P)                 | 1.44 |
|            | Glycerolipid metabolism                              | phosphoethanolamine                        | 5.52 |
|            | Glycerolipid metabolism                              | glycerophosphorylcholine (GPC)             | 1.36 |
|            | Glycerolipid metabolism                              | cytidine 5'-diphosphocholine               | 1.57 |
|            | Glycerolipid metabolism                              | choline                                    | 1.73 |
|            | Inositol metabolism                                  | inositol hexaphosphate (IP6)               | 3.21 |
|            | Long chain fatty acid                                | linoleate (18:2n6)                         | 1.74 |
|            | Long chain fatty acid                                | 10-heptadecenoate (17:1n7)                 | 1.26 |
|            | Long chain fatty acid                                | 10-nonadecenoate (19:1n9)                  | 1.33 |
|            | Long chain fatty acid                                | oleate (18:1n9)                            | 1.3  |
|            | Long chain fatty acid                                | dihomo-linoleate (20:2n6)                  | 1.44 |
|            | Long chain fatty acid                                | mead acid (20:3n9)                         | 1.81 |
|            | Long chain fatty acid                                | palmitate (16:0)                           | 1.18 |
|            | Long chain fatty acid                                | arachidonate (20:4n6)                      | 2.45 |
|            | Lysolipid                                            | 1-arachidonoylglycerophosphoinositol*      | 2.62 |
|            | Lysolipid                                            | 1-stearoylglycerophosphoethanolamine       | 1.55 |
|            | Lysolipid                                            | 1-arachidonoylglycerophosphoethanolamine*  | 1.48 |
|            | Monoacylglycerol                                     | 2-linoleoylglycerol (2-monolinolein)       | 1.37 |
|            | Monoacylglycerol                                     | 2-arachidonoyl glycerol                    | 1.73 |
|            | Monoacylglycerol                                     | 2-palmitoylglycerol (2-monopalmitin)       | 1.3  |
|            | Sphingolipid                                         | palmitoyl sphingomyelin                    | 1.24 |
|            | Sterol/Steroid                                       | cholesterol                                | 1.32 |
| Nucleotide | Purine metabolism, (hypo)xanthine/inosine containing | inosine 5'-monophosphate (IMP)             | 4.83 |
|            | Purine metabolism, adenine containing                | adenine                                    | 2.96 |
|            | Purine metabolism, guanine containing                | guanosine 5'- monophosphate (GMP)          | 1.4  |
|            | Purine metabolism, guanine containing                | guanosine 5'-diphospho-fucose              | 1.24 |
|            | Pyrimidine metabolism, cytidine containing           | cytidine 5'-monophosphate (5'-CMP)         | 1.26 |
|            | Pyrimidine metabolism, uracil containing             | pseudouridine                              | 2.13 |
|            | Pyrimidine metabolism, uracil containing             | uridine                                    | 1.88 |
|            | Pyrimidine metabolism, uracil containing             | uridine 5'-monophosphate (UMP)             | 1.43 |

| <b>Downregulated</b>                  |                                             |                                       |                                  |      |
|---------------------------------------|---------------------------------------------|---------------------------------------|----------------------------------|------|
| Amino acid                            | Alanine and aspartate metabolism            | alanine                               | 0.46                             |      |
|                                       | Alanine and aspartate metabolism            | aspartate                             | 0.34                             |      |
|                                       | Glutamate metabolism                        | glutamine                             | 0.21                             |      |
|                                       | Glutamate metabolism                        | glutamate                             | 0.52                             |      |
|                                       | Glutathione metabolism                      | 5-oxoproline                          | 0.7                              |      |
|                                       | Glutathione metabolism                      | glutathione, reduced (GSH)            | 0.69                             |      |
|                                       | Urea cycle; arginine-, proline-, metabolism | ornithine                             | 0.18                             |      |
|                                       | Urea cycle; arginine-, proline-, metabolism | proline                               | 0.67                             |      |
|                                       | Energy                                      | Krebs cycle                           | malate                           | 0.72 |
|                                       | Nucleotide                                  | Purine metabolism, adenine containing | adenosine 5'-monophosphate (AMP) | 0.88 |
| Purine metabolism, adenine containing |                                             | adenosine 3',5'-diphosphate           | 0.37                             |      |
| Purine metabolism, adenine containing |                                             | adenylosuccinate                      | 0.8                              |      |
| Peptide                               | gamma-glutamyl                              | gamma-glutamylthreonine*              | 0.31                             |      |

\*indicates a biochemical that has not been confirmed with an authentic standard but whose spectral properties strongly support its identity

**Supplementary Table S2. Real-time PCR primer pairs**

| Gene          | Forward primer            | Reverse primer           |
|---------------|---------------------------|--------------------------|
| <i>Aco1</i>   | CCATCCGTGATGTTAGGAGCAG    | GACAGGTAAGGCATGACTCCAC   |
| <i>Atg5</i>   | CAGAAGGTTATGAGACAAGAAGATG | TGGATGGACAGTGTAGAAGGTC   |
| <i>Cs</i>     | ATGCAGAGGGAATGAACCGAGC    | GAGTCAATGGCTCCGATACTGC   |
| <i>Flnb</i>   | GAACTCACACGCAGGATGCTGT    | GGCGGCTTTTATTCTCACCATCG  |
| <i>Gapdh</i>  | CCCCTTCATTGACCTCAACTA     | CTCCTGGAAGATGGTGATGG     |
| <i>Gpt2</i>   | CATTGCGGCAAGCCAAAGACCA    | GCTTCTCTCCCAGGCCAAAGTG   |
| <i>Idh1</i>   | GCTGGCTTTGTATCTCA         | CGCCATCATACTTCTTCA       |
| <i>Idh2</i>   | GGCTGTCAAGTGTGCCACAATC    | TTGGCTCTCTGAAGACGGTTCC   |
| <i>Ldhb</i>   | CCTCAGATCGTCAAGTACAGCC    | ATCCGCTTCCAATCACACGGTG   |
| <i>Mdh1</i>   | TTCTGGACGGTGTCTGATGGA     | TAGGACAGCCACATCCAGGTCT   |
| <i>Me1</i>    | ATGGAGAAGGAAGGTTTATCAAAG  | GGCTTCTAGGTTCTTCATTTCTTC |
| <i>Me2</i>    | GGCTAAGAGCTGTTACCACTCC    | CGTAAACGCCATTCCCTTGT     |
| <i>Myc</i>    | TCGCTGCTGCCTCCGAGTCC      | GGTTTGCCTCTTCTCCACAGAC   |
| <i>Ogdh</i>   | GGTGTGTCATCAATCAGCCTGAGT  | ATCCAGCCAGTGCTTGATGTGC   |
| <i>Sdha</i>   | GAGATACGCACCTGTTGCCAAG    | GGTAGACGTGATCTTTCTCAGGG  |
| <i>Sdhb</i>   | TGCGGACCTATGGTGTGGATG     | CCAGAGTATTGCCTCCGTTGATG  |
| <i>Slc1a5</i> | CTGCCTGTGAAGGACATCTCCT    | CTCGGCATCTTGGTTCGATCCA   |
| <i>Slc3a2</i> | GAGCGTACTGAATCCCTAGTCAC   | GCTGGTAGAGTCGGAGAAGATG   |
| <i>Slc7a5</i> | GGTCTCTGTTACGTCCTCAAG     | GAACACCAGTGATGGCACAGGT   |
| <i>Sucla2</i> | GGTGTCTCTGTTCCCAAAGGCT    | TTTCTCTGCCGCCAGCCAAAA    |
| <i>Suclg1</i> | GTCTTACACAGCCTCTCGGAAAC   | ACTCCAAAGCCTGCTGACTGTG   |
| <i>Suclg2</i> | AGCTCAAGGTGCCACTGGTAGT    | GCTTTCTTGGCTGCATCCTCCA   |
| <i>Cdkn1a</i> | TCGCTGTCTTGCACTCTGGTGT    | CCAATCTGCGCTTGGAGTGATAG  |
| <i>Bbc3</i>   | ACCGCTCCACCTGCCGTAC       | ACGGGCGACTCTAAGTGCTGC    |
| <i>Pmaip1</i> | GGAAGTCGCAAAGAGCAGGATG    | CTGCCGTAAATTCACCTTGTCTCC |
